# Supplementary material
Source: Elsevier journal article supplement (https://www.sciencedirect.com/science/article/pii/S2531043721001914)
Supplement: mmc1 [file S2531043721001914:mmc1.docx]

**Supplementary Tables**

| **Supplementary Table 1.** Frequencies for HLA-A* alleles in HP patients versus Controls | | | | | |
| --- | --- | --- | --- | --- | --- |
|  | HP  (N=40) | Controls  (N=70) |  |  |  |
| allele | n(%) | n(%) | OR‡ | 95%CI | p value† |
| A*01 | 7(8.75%) | 12(8.57%) | 1.02 | 0.39 ; 2.71 | 0.96 |
| A*02 | 28(35%) | 36(25.71%) | 1.56 | 0.86 ; 2.82 | 0.15 |
| A*03 | 9(11.25%) | 10(7.14%) | 1.65 | 0.64 ; 4.24 | 0.30 |
| A*11 | 7(8.75%) | 7(5%) | 1.82 | 0.62 ; 5.4 | 0.27 |
| A*23 | 3(3.75%) | 7(5%) | 0.74 | 0.19 ; 2.95 | 0.67 |
| A*24 | 8(10%) | 21(15%) | 0.63 | 0.27 ; 1.5 | 0.29 |
| A*25 | 0(0%) | 1(0.71%) | 0.00 | -- | 1.00* |
| A*26 | 2(2.5%) | 4(2.86%) | 0.87 | 0.16 ; 4.87 | 1.00* |
| A*29 | 3(3.75%) | 4(2.86%) | 1.32 | 0.29 ; 6.07 | 0.71* |
| A*30 | 2(2.5%) | 6(4.29%) | 0.57 | 0.11 ; 2.91 | 0.71* |
| A*31 | 0(0%) | 5(3.57%) | 0.00 | -- | 0.16* |
| A*32 | 4(5%) | 7(5%) | 1.00 | 0.28 ; 3.53 | 1.00 |
| A*33 | 2(2.5%) | 3(2.14%) | 1.17 | 0.19 ; 7.16 | 1.00* |
| A*34 | 0(0%) | 1(0.71%) | 0.00 | -- | 1.00* |
| A*66 | 0(0%) | 2(1.43%) | 0.00 | -- | 0.54* |
| A*68 | 4(5%) | 12(8.57%) | 0.56 | 0.17 ; 1.8 | 0.33 |
| A*69 | 1(1.25%) | 1(0.71%) | 1.76 | 0.11 ; 28.52 | 1.00* |
| A*80 | 0(0%) | 1(0.71%) | 0.00 | -- | 1.00* |
| N number of individuals  n(%) number of alleles (percentage)  OR odds ratio  95%CI 95% confidence interval  ‡ each allele (or genotype) was compared to the remaining alleles (or genotypes)  * p-value for Fisher exact test  † p-value not corrected for multiple comparisons | | | | | |

| **Supplementary Table 2.** Frequencies for HLA-B* alleles in HP patients versus controls | | | | | |
| --- | --- | --- | --- | --- | --- |
|  | HP  (n=40) | Controls  (n=70) |  |  |  |
| allele | n(%) | n(%) | OR‡ | 95%CI | p value† |
| B*07 | 6(7.5%) | 9(6.43%) | 1.18 | 0.4 ; 3.45 | 0.76 |
| B*08 | 5(6.25%) | 8(5.71%) | 1.10 | 0.35 ; 3.48 | 0.87 |
| B*13 | 1(1.25%) | 3(2.14%) | 0.58 | 0.06 ; 5.65 | 1.0* |
| B*14 | 7(8.75%) | 12(8.57%) | 1.02 | 0.39 ; 2.71 | 0.96 |
| B*15 | 2(2.5%) | 14(10%) | 0.23 | 0.05 ; 1.04 | 0.06* |
| B*18 | 3(3.75%) | 10(7.14%) | 0.51 | 0.14 ; 1.9 | 0.38* |
| B*27 | 5(6.25%) | 3(2.14%) | 3.04 | 0.71 ; 13.09 | 0.14* |
| B*35 | 9(11.25%) | 12(8.57%) | 1.35 | 0.54 ; 3.36 | 0.52 |
| B*38 | 1(1.25%) | 0(0%) | -- | -- | 0.36* |
| B*39 | 2(2.5%) | 1(0.71%) | 3.56 | 0.32 ; 39.94 | 0.30* |
| B*40 | 3(3.75%) | 6(4.29%) | 0.87 | 0.21 ; 3.58 | 1.00* |
| B*41 | 3(3.75%) | 2(1.43%) | 2.69 | 0.44 ; 16.44 | 0.36* |
| B*42 | 0(0%) | 1(0.71%) | 0.00 | -- | 1.00* |
| B*44 | 14(17.5%) | 21(15%) | 1.20 | 0.57 ; 2.52 | 0.63 |
| B*45 | 1(1.25%) | 0(0%) | -- | -- | 0.36* |
| B*49 | 1(1.25%) | 10(7.14%) | 0.16 | 0.02 ; 1.31 | 0.06* |
| B*50 | 2(2.5%) | 10(7.14%) | 0.33 | 0.07 ; 1.56 | 0.22* |
| B*51 | 8(10%) | 10(7.14%) | 1.44 | 0.55 ; 3.82 | 0.46 |
| B*53 | 0(0%) | 2(1.43%) | 0.00 | -- | 0.54* |
| B*55 | 2(2.5%) | 0(0%) | -- | -- | 0.13* |
| B*57 | 2(2.5%) | 4(2.86%) | 0.87 | 0.16 ; 4.87 | 1.00* |
| B*58 | 3(3.75%) | 1(0.71%) | 5.42 | 0.55 ; 52.96 | 0.14* |
| B*67 | 0(0%) | 1(0.71%) | 0.00 | -- | 1.00* |
| N number of individuals  n(%) number of alleles (percentage)  OR odds ratio  95%CI 95% confidence interval  ‡ each allele (or genotype) was compared to the remaining alleles (or genotypes)  * p-value for Fisher exact test  † p-value not corrected for multiple comparisons | | | | | |

| **Supplementary Table 3.** Frequencies for HLA-DRB1* alleles in HP patients versus Controls | | | | | |
| --- | --- | --- | --- | --- | --- |
|  | HP  (n=40) | Controls  (n=70) | |  |  |
| allele | n(%) | n(%) | OR‡ | 95%CI | p value† |
| DRB1*01 | 8(10%) | 17(12.14%) | 0.80 | 0.33 ; 1.96 | 0.63 |
| DRB1*03 | 11(13.75%) | 18(12.86%) | 1.08 | 0.48 ; 2.42 | 0.85 |
| DRB1*04 | 9(11.25%) | 25(17.86%) | 0.58 | 0.26 ; 1.32 | 0.19 |
| DRB1*07 | 10(12.5%) | 15(10.71%) | 1.19 | 0.51 ; 2.79 | 0.69 |
| DRB1*08 | 4(5%) | 5(3.57%) | 1.42 | 0.37 ; 5.45 | 0.73* |
| DRB1*09 | 0(0%) | 1(0.71%) | 0.00 | -- | 1.00* |
| DRB1*11 | 8(10%) | 17(12.14%) | 0.80 | 0.33 ; 1.96 | 0.63 |
| DRB1*12 | 3(3.75%) | 0(0%) | -- | -- | 0.05* |
| DRB1*13 | 13(16.25%) | 28(20%) | 0.78 | 0.38 ; 1.6 | 0.49 |
| DRB1*14 | 4(5%) | 1(0.71%) | 7.32 | 0.8 ; 66.63 | 0.06* |
| DRB1*15 | 6(7.5%) | 12(8.57%) | 0.86 | 0.31 ; 2.4 | 0.78 |
| DRB1*16 | 4(5%) | 1(0.71%) | 7.32 | 0.8 ; 66.63 | 0.06* |
| N number of individuals  n(%) number of alleles (percentage)  OR odds ratio  95%CI 95% confidence interval  ‡ each allele (or genotype) was compared to the remaining alleles (or genotypes)  * p-value for Fisher exact test  † p-value not corrected for multiple comparisons | | | | | |

| **Supplementary Table 4.** Frequencies for HLA-A* alleles in fibrotic HP patients versus controls | | | | | |
| --- | --- | --- | --- | --- | --- |
|  | Fibrotic (N=15) | Controls (N=70) |  |  |  |
| allele | n(%) | n(%) | OR‡ | 95%CI | p value† |
| A*01 | 4(13.33%) | 12(8.57%) | 1.64 | 0.49 ; 5.49 | 0.42 |
| A*02 | 14(46.67%) | 36(25.71%) | 2.53 | 1.12 ; 5.69 | 0.02 |
| A*03 | 2(6.67%) | 10(7.14%) | 0.93 | 0.19 ; 4.47 | 1.00* |
| A*11 | 3(10%) | 7(5%) | 2.11 | 0.51 ; 8.69 | 0.38* |
| A*23 | 1(3.33%) | 7(5%) | 0.66 | 0.08 ; 5.53 | 1.00* |
| A*24 | 1(3.33%) | 21(15%) | 0.20 | 0.03 ; 1.51 | 0.13* |
| A*25 | 0(0%) | 1(0.71%) | 0.00 | -- | 1.00* |
| A*26 | 0(0%) | 4(2.86%) | 0.00 | -- | 1.00* |
| A*29 | 1(3.33%) | 4(2.86%) | 1.17 | 0.13 ; 10.88 | 1.00* |
| A*30 | 1(3.33%) | 6(4.29%) | 0.77 | 0.09 ; 6.64 | 1.00* |
| A*31 | 0(0%) | 5(3.57%) | 0.00 | -- | 0.59* |
| A*32 | 0(0%) | 7(5%) | 0.00 | -- | 0.36* |
| A*33 | 1(3.33%) | 3(2.14%) | 1.57 | 0.16 ; 15.68 | 0.54* |
| A*34 | 0(0%) | 1(0.71%) | 0.00 | -- | 1.00* |
| A*66 | 0(0%) | 2(1.43%) | 0.00 | -- | 1.00* |
| A*68 | 2(6.67%) | 12(8.57%) | 0.76 | 0.16 ; 3.6 | 1.00* |
| A*69 | 0(0%) | 1(0.71%) | 0.00 | -- | 1.00* |
| A*80 | 0(0%) | 1(0.71%) | 0.00 | -- | 1.00* |
| N number of individuals  n(%) number of alleles (percentage)  OR odds ratio  95%CI 95% confidence interval  ‡ each allele (or genotype) was compared to the remaining alleles (or genotypes)  * p-value for Fisher exact test  † p-value not corrected for multiple comparisons | | | | | |

| **Supplementary Table 5.** Frequencies for HLA-B* alleles in fibrotic HP patients versus controls | | | | | |
| --- | --- | --- | --- | --- | --- |
|  | Fibrotic (N=15) | Controls (N=70) |  |  |  |
| allele | n(%) | n(%) | OR‡ | 95%CI | p value † |
| B*07 | 1(3.33%) | 9(6.43%) | 0.50 | 0.06 ; 4.12 | 1.00* |
| B*08 | 3(10%) | 8(5.71%) | 1.83 | 0.46 ; 7.36 | 0.41* |
| B*13 | 0(0%) | 3(2.14%) | 0.00 | -- | 1.00* |
| B*14 | 2(6.67%) | 12(8.57%) | 0.76 | 0.16 ; 3.6 | 1.00* |
| B*15 | 0(0%) | 14(10%) | 0.00 | -- | 0.13* |
| B*18 | 0(0%) | 10(7.14%) | 0.00 | -- | 0.21* |
| B*27 | 1(3.33%) | 3(2.14%) | 1.57 | 0.16 ; 15.68 | 0.54* |
| B*35 | 3(10%) | 12(8.57%) | 1.19 | 0.31 ; 4.49 | 0.73* |
| B*39 | 1(3.33%) | 1(0.71%) | 4.79 | 0.29 ; 78.87 | 0.32* |
| B*40 | 1(3.33%) | 6(4.29%) | 0.77 | 0.09 ; 6.64 | 1.00* |
| B*41 | 1(3.33%) | 2(1.43%) | 2.38 | 0.21 ; 27.13 | 0.44* |
| B*42 | 0(0%) | 1(0.71%) | 0.00 | -- | 1.00* |
| B*44 | 8(26.67%) | 21(15%) | 2.06 | 0.81 ; 5.24 | 0.12 |
| B*45 | 1(3.33%) | 0(0%) | -- | -- | 0.18 |
| B*49 | 1(3.33%) | 10(7.14%) | 0.45 | 0.06 ; 3.64 | 0.69* |
| B*50 | 2(6.67%) | 10(7.14%) | 0.93 | 0.19 ; 4.47 | 1.00* |
| B*51 | 3(10%) | 10(7.14%) | 1.44 | 0.37 ; 5.6 | 0.70* |
| B*53 | 0(0%) | 2(1.43%) | 0.00 | -- | 1.00* |
| B*57 | 0(0%) | 4(2.86%) | 0.00 | -- | 1.00* |
| B*58 | 2(6.67%) | 1(0.71%) | 9.93 | 0.87 ; 113.3 | 0.08* |
| B*67 | 0(0%) | 1(0.71%) | 0.00 | -- | 1.00* |
| N number of individuals  n(%) number of alleles (percentage)  OR odds ratio  95%CI 95% confidence interval  ‡ each allele (or genotype) was compared to the remaining alleles (or genotypes)  * p-value for Fisher exact test  † p-value not corrected for multiple comparisons | | | | | |

| **Supplementary Table 6.** Frequencies for HLA-DRB1* alleles in fibrotic HP patients versus controls | | | | | |
| --- | --- | --- | --- | --- | --- |
|  | Fibrotic (N=15) | Controls (N=70) |  |  |  |
| allele | n(%) | n(%) | OR‡ | 95%CI | p value † |
| DRB1*01 | 3(10%) | 17(12.14%) | 0.80 | 0.22 ; 2.94 | 1.00* |
| DRB1*03 | 5(16.67%) | 18(12.86%) | 1.36 | 0.46 ; 3.99 | 0.58 |
| DRB1*04 | 5(16.67%) | 25(17.86%) | 0.92 | 0.32 ; 2.64 | 0.88 |
| DRB1*07 | 3(10%) | 15(10.71%) | 0.93 | 0.25 ; 3.42 | 1.00* |
| DRB1*08 | 1(3.33%) | 5(3.57%) | 0.93 | 0.1 ; 8.27 | 1.00* |
| DRB1*09 | 0(0%) | 1(0.71%) | 0.00 | 0 ; NaN | 1.00* |
| DRB1*11 | 2(6.67%) | 17(12.14%) | 0.52 | 0.11 ; 2.37 | 0.53* |
| DRB1*12 | 1(3.33%) | 0(0%) | Inf | NaN ; Inf | 0.18* |
| DRB1*13 | 4(13.33%) | 28(20%) | 0.62 | 0.2 ; 1.91 | 0.40 |
| DRB1*14 | 3(10%) | 1(0.71%) | 15.44 | 1.55 ; 154.11 | 0.02* |
| DRB1*15 | 2(6.67%) | 12(8.57%) | 0.76 | 0.16 ; 3.6 | 1.00* |
| DRB1*16 | 1(3.33%) | 1(0.71%) | 4.79 | 0.29 ; 78.87 | 0.32* |
| N number of individuals  n(%) number of alleles (percentage)  OR odds ratio  95%CI 95% confidence interval  ‡ each allele (or genotype) was compared to the remaining alleles (or genotypes)  * p-value for Fisher exact test  † p-value not corrected for multiple comparisons | | | | | |

| **Supplementary Table 7.** Frequencies for HLA-A* alleles in non fibrotic HP patients versus controls | | | | | |
| --- | --- | --- | --- | --- | --- |
|  | Non Fibrotic (N=25) | Controls (N=70) |  |  |  |
| allele | n(%) | n(%) | OR‡ | 95%CI | p value † |
| A*01 | 3(6%) | 12(8.57%) | 0.68 | 0.18 ; 2.52 | 0.76* |
| A*02 | 14(28%) | 36(25.71%) | 1.12 | 0.54 ; 2.32 | 0.85* |
| A*03 | 7(14%) | 10(7.14%) | 2.12 | 0.76 ; 5.9 | 0.15 |
| A*11 | 4(8%) | 7(5%) | 1.65 | 0.46 ; 5.9 | 0.44 |
| A*23 | 2(4%) | 7(5%) | 0.79 | 0.16 ; 3.94 | 1.00* |
| A*24 | 7(14%) | 21(15%) | 0.92 | 0.37 ; 2.32 | 0.86 |
| A*25 | 0(0%) | 1(0.71%) | 0.00 | -- | 1.00* |
| A*26 | 2(4%) | 4(2.86%) | 1.42 | 0.25 ; 7.98 | 0.65* |
| A*29 | 2(4%) | 4(2.86%) | 1.42 | 0.25 ; 7.98 | 0.65* |
| A*30 | 1(2%) | 6(4.29%) | 0.46 | 0.05 ; 3.88 | 0.6* |
| A*31 | 0(0%) | 5(3.57%) | 0.00 | -- | 0.33* |
| A*32 | 4(8%) | 7(5%) | 1.65 | 0.46 ; 5.9 | 0.44 |
| A*33 | 1(2%) | 3(2.14%) | 0.93 | 0.09 ; 9.17 | 1.00* |
| A*34 | 0(0%) | 1(0.71%) | 0.00 | -- | 1.00* |
| A*66 | 0(0%) | 2(1.43%) | 0.00 | -- | 1.00* |
| A*68 | 2(4%) | 12(8.57%) | 0.44 | 0.1 ; 2.06 | 0.36* |
| A*69 | 1(2%) | 1(0.71%) | 2.84 | 0.17 ; 46.23 | 0.46* |
| A*80 | 0(0%) | 1(0.71%) | 0.00 | -- | 1.00* |
| N number of individuals  n(%) number of alleles (percentage)  OR odds ratio  95%CI 95% confidence interval  ‡ each allele (or genotype) was compared to the remaining alleles (or genotypes)  * p-value for Fisher exact test  † p-value not corrected for multiple comparisons | | | | | |

| **Supplementary Table 8.** Frequencies for HLA-B* alleles in non fibrotic HP patients versus controls | | | | | |
| --- | --- | --- | --- | --- | --- |
|  | Non Fibrotic (N=25) | Controls (N=70) |  |  |  |
| allele | n(%) | n(%) | OR‡ | 95%CI | p value † |
| B*07 | 5(10%) | 9(6.43%) | 1.62 | 0.51 ; 5.08 | 0.41 |
| B*08 | 2(4%) | 8(5.71%) | 0.69 | 0.14 ; 3.35 | 1.00* |
| B*13 | 1(2%) | 3(2.14%) | 0.93 | 0.09 ; 9.17 | 1.00* |
| B*14 | 5(10%) | 12(8.57%) | 1.19 | 0.4 ; 3.55 | 0.76 |
| B*15 | 2(4%) | 14(10%) | 0.38 | 0.08 ; 1.71 | 0.25* |
| B*18 | 3(6%) | 10(7.14%) | 0.83 | 0.22 ; 3.15 | 1.00* |
| B*27 | 4(8%) | 3(2.14%) | 3.97 | 0.86 ; 18.41 | 0.08* |
| B*35 | 6(12%) | 12(8.57%) | 1.45 | 0.52 ; 4.11 | 0.477 |
| B*38 | 1(2%) | 0(0%) | -- | -- | 0.26* |
| B*39 | 1(2%) | 1(0.71%) | 2.84 | 0.17 ; 46.23 | 0.46* |
| B*40 | 2(4%) | 6(4.29%) | 0.93 | 0.18 ; 4.77 | 1.00* |
| B*41 | 2(4%) | 2(1.43%) | 2.88 | 0.39 ; 20.98 | 0.28* |
| B*42 | 0(0%) | 1(0.71%) | 0.00 | -- | 1.00* |
| B*44 | 6(12%) | 21(15%) | 0.77 | 0.29 ; 2.04 | 0.60 |
| B*49 | 0(0%) | 10(7.14%) | 0.00 | -- | 0.06* |
| B*50 | 0(0%) | 10(7.14%) | 0.00 | -- | 0.06* |
| B*51 | 5(10%) | 10(7.14%) | 1.44 | 0.47 ; 4.45 | 0.52 |
| B*53 | 0(0%) | 2(1.43%) | 0.00 | -- | 1.00* |
| B*55 | 2(4%) | 0(0%) | -- | -- | 0.07* |
| B*57 | 2(4%) | 4(2.86%) | 1.42 | 0.25 ; 7.98 | 0.65* |
| B*58 | 1(2%) | 1(0.71%) | 2.84 | 0.17 ; 46.23 | 0.46* |
| B*67 | 0(0%) | 1(0.71%) | 0.00 | -- | 1.00* |
| N number of individuals  n(%) number of alleles (percentage)  OR odds ratio  95%CI 95% confidence interval  ‡ each allele (or genotype) was compared to the remaining alleles (or genotypes)  * p-value for Fisher exact test  † p-value not corrected for multiple comparisons | | | | | |

| **Supplementary Table 9.** Frequencies for HLA-DRB1* alleles in non fibrotic HP patients versus controls | | | | | |
| --- | --- | --- | --- | --- | --- |
|  | Non Fibrotic (N=25) | Controls (N=70) |  |  |  |
| allele | n(%) | n(%) | OR‡ | 95%CI | p value † |
| DRB1*01 | 5(10%) | 17(12.14%) | 0.80 | 0.28 ; 2.31 | 0.68 |
| DRB1*03 | 6(12%) | 18(12.86%) | 0.92 | 0.34 ; 2.48 | 0.8* |
| DRB1*04 | 4(8%) | 25(17.86%) | 0.40 | 0.13 ; 1.21 | 0.09 |
| DRB1*07 | 7(14%) | 15(10.71%) | 1.36 | 0.52 ; 3.55 | 0.53 |
| DRB1*08 | 3(6%) | 5(3.57%) | 1.72 | 0.4 ; 7.49 | 0.44* |
| DRB1*09 | 0(0%) | 1(0.71%) | 0.00 | -- | 1.00* |
| DRB1*11 | 6(12%) | 17(12.14%) | 0.99 | 0.37 ; 2.66 | 0.98 |
| DRB1*12 | 2(4%) | 0(0%) | -- | -- | 0.07* |
| DRB1*13 | 9(18%) | 28(20%) | 0.88 | 0.38 ; 2.02 | 0.76 |
| DRB1*14 | 1(2%) | 1(0.71%) | 2.84 | 0.17 ; 46.23 | 0.46* |
| DRB1*15 | 4(8%) | 12(8.57%) | 0.93 | 0.28 ; 3.02 | 0.90 |
| DRB1*16 | 3(6%) | 1(0.71%) | 8.87 | 0.9 ; 87.37 | 0.06* |
| N number of individuals  n(%) number of alleles (percentage)  OR odds ratio  95%CI 95% confidence interval  ‡ each allele (or genotype) was compared to the remaining alleles (or genotypes)  * p-value for Fisher exact test  † p-value not corrected for multiple comparisons | | | | | |
